# Supplementary material
Source: publisher figshare collection journal article supplement (https://acs.figshare.com/ndownloader/files/17726042)
Supplement: Supplementary file 1 [file 17726042]

*Supporting Information*

**Characteristics of biomass devolatilization and in-situ char  
gasification by the non-isothermal method**

Xi Zeng<sup>1,2\*</sup>, Kaito Kahara<sup>3</sup>, Yasuaki Ueki<sup>1</sup>, Ryo Yoshiie<sup>3</sup>, Guangwen Xu<sup>2</sup>, Ichiro Naruse<sup>1</sup>

1 Institute of Materials and Systems for Sustainability (IMaSS), Nagoya University, Nagoya  
464-8601, Japan

2 State Key Laboratory of Multi-Phase Complex Systems, Institute of Process Engineering,  
Chinese Academy of Sciences, Beijing 100190, People's Republic of China

3 Department of Mechanical Systems Engineering, Nagoya University, Nagoya 464-8601,  
Japan

\*Authors to whom correspondence should be addressed. Phone: +81-52-789-2710; Fax:  
+81-52-789-5123; E-mail: zengxi1234@163.com (Xi Zeng).

24  
25  
26  
27  
28  
29  
30  
31  
32  
33  
34  
35  
36  
37

**Table S1** Correlation coefficient of BD and CG under different reaction orders

| Biomass devolatilization stage |                                       | Char gasification stage |                                       |
|--------------------------------|---------------------------------------|-------------------------|---------------------------------------|
| Reaction order                 | Correlation                           | Reaction order          | Correlation                           |
| ( <i>n</i> )                   | coefficient ( <i>R</i> <sup>2</sup> ) | ( <i>n</i> )            | coefficient ( <i>R</i> <sup>2</sup> ) |
| n=0.6                          | 0.9901                                | n=0.1                   | 0.9812                                |
| n=0.7                          | 0.9915                                | n=0.2                   | 0.983                                 |
| n=0.8                          | 0.9928                                | n=0.3                   | 0.9844                                |
| n=0.9                          | 0.9939                                | n=0.4                   | 0.9852                                |
| n=1.0                          | 0.9948                                | n=0.5                   | 0.9862                                |
| n=1.1                          | 0.9945                                | n=0.6                   | 0.9887                                |
| /                              | /                                     | n=2/3                   | 0.9917                                |
| /                              | /                                     | n=0.7                   | 0.9903                                |

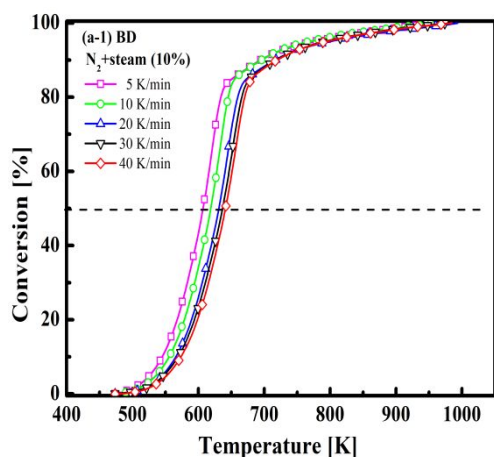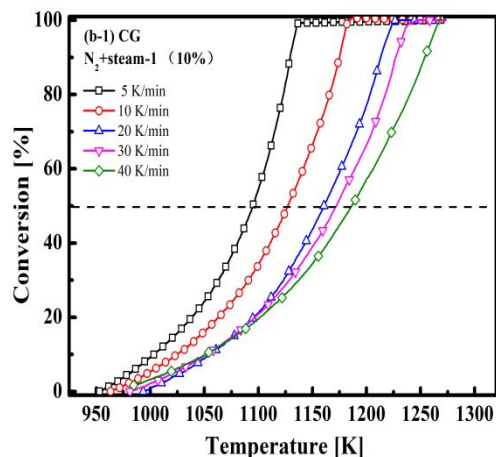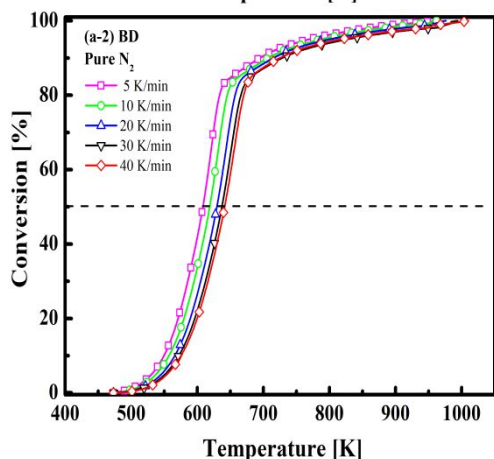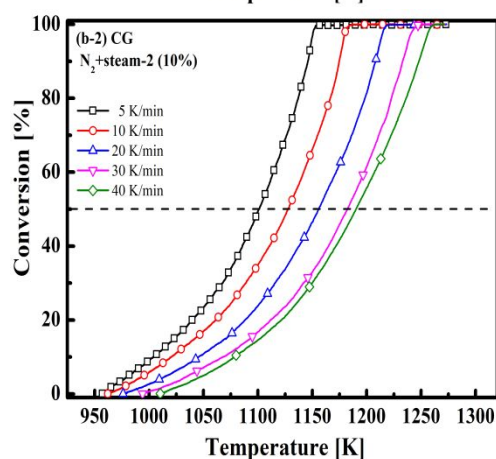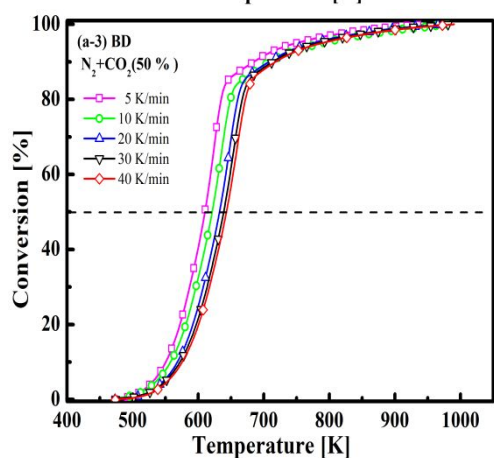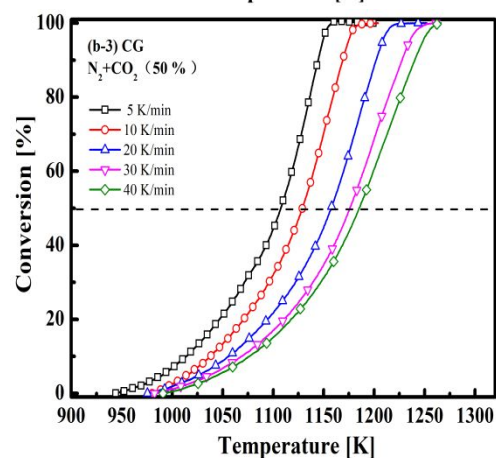

**Fig. S1** Relationship of  $X$ - $T$  for BD and CG in different atmospheres and heating rates
